# Supplementary material
Source: PubMed Central journal article supplement (PMC3578061)

Supplemental Fig. 1 Ye, et al.

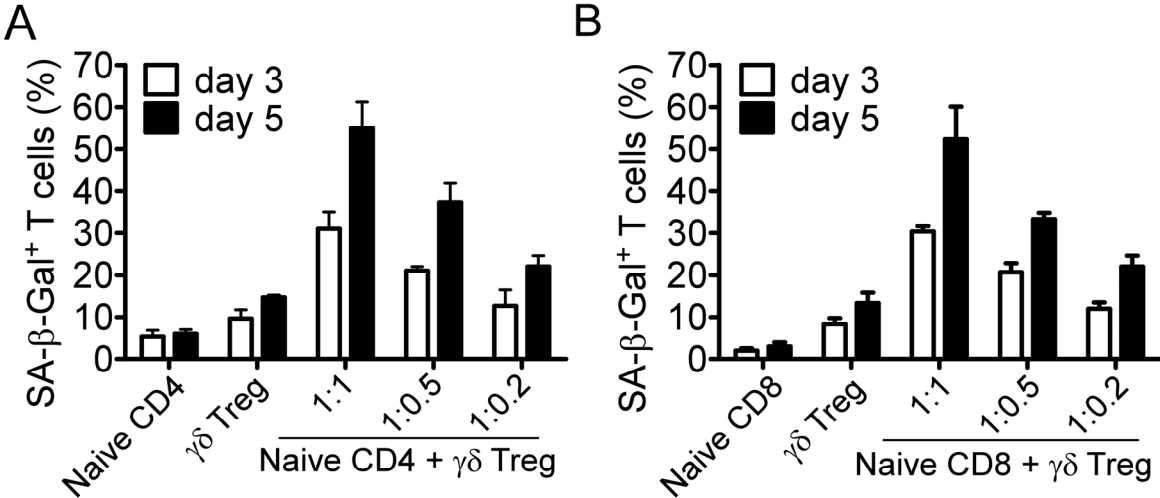

Supplemental Fig. 2 Ye, et al.

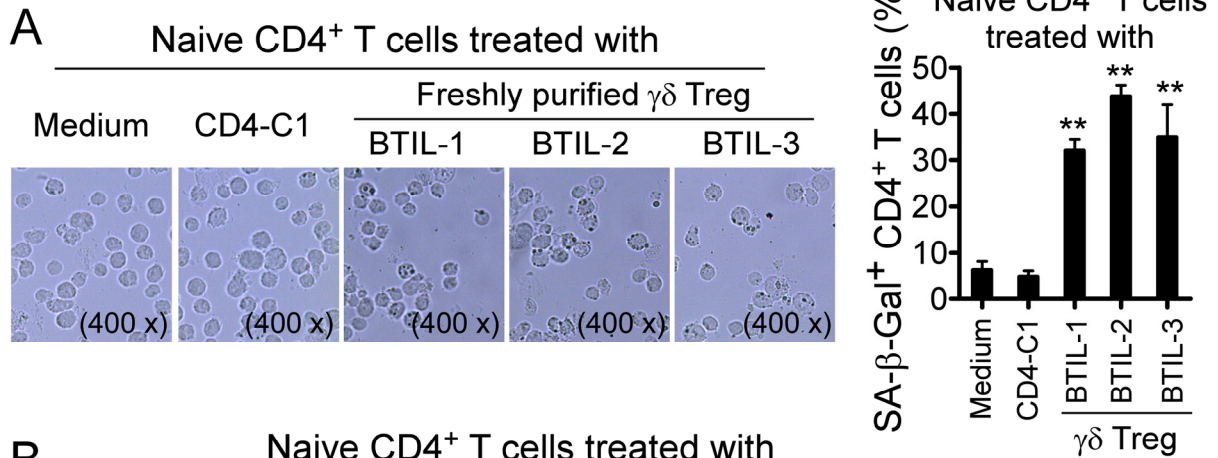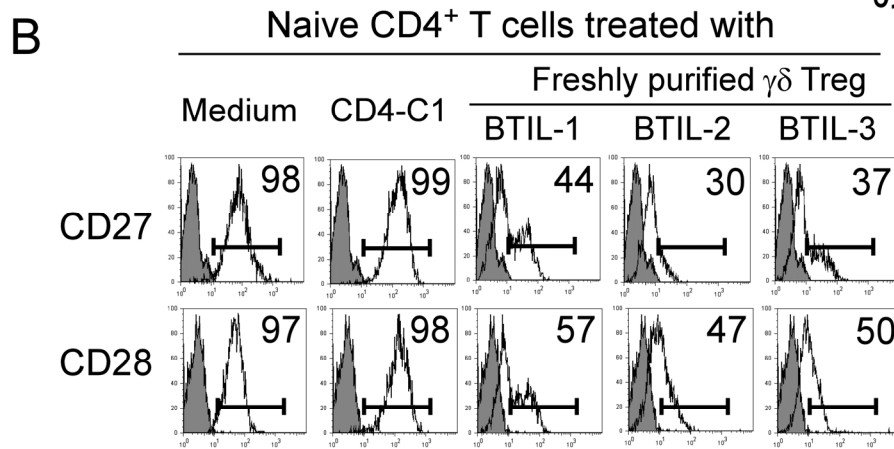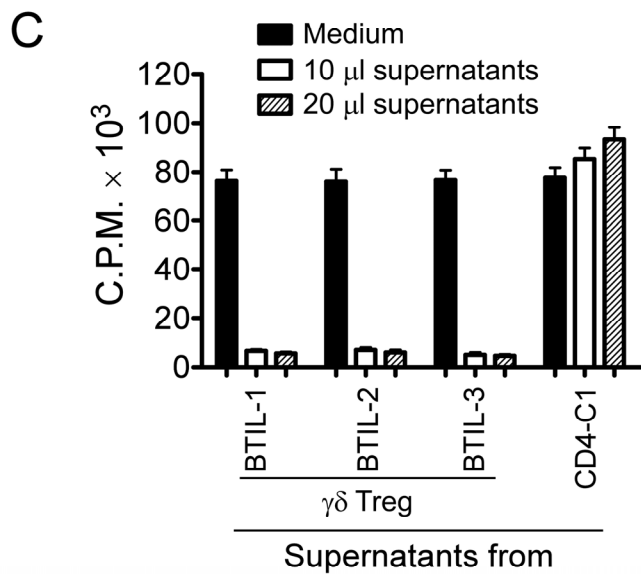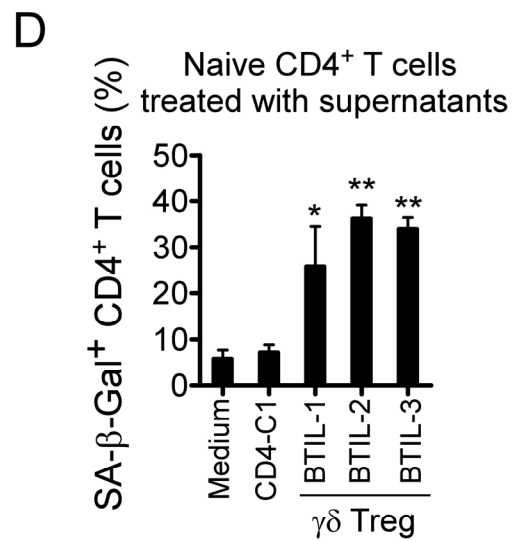

Supplemental Fig. 3 Ye, et al.

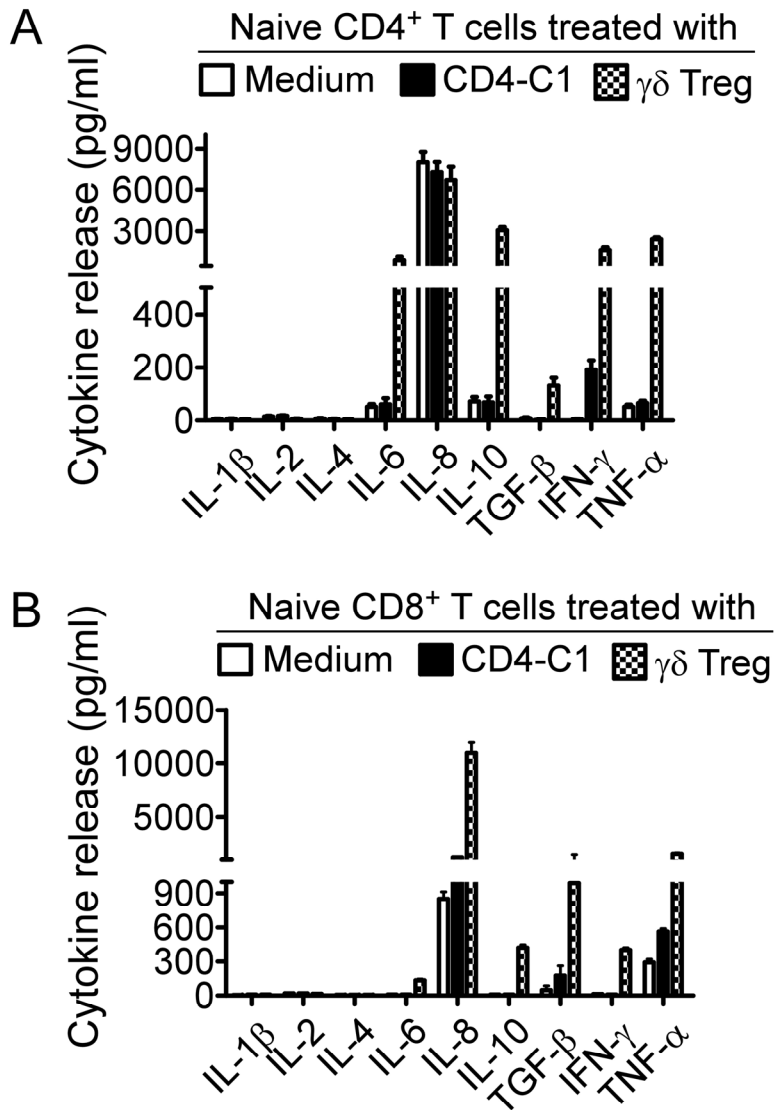

Supplemental Fig. 4 Ye, et al.

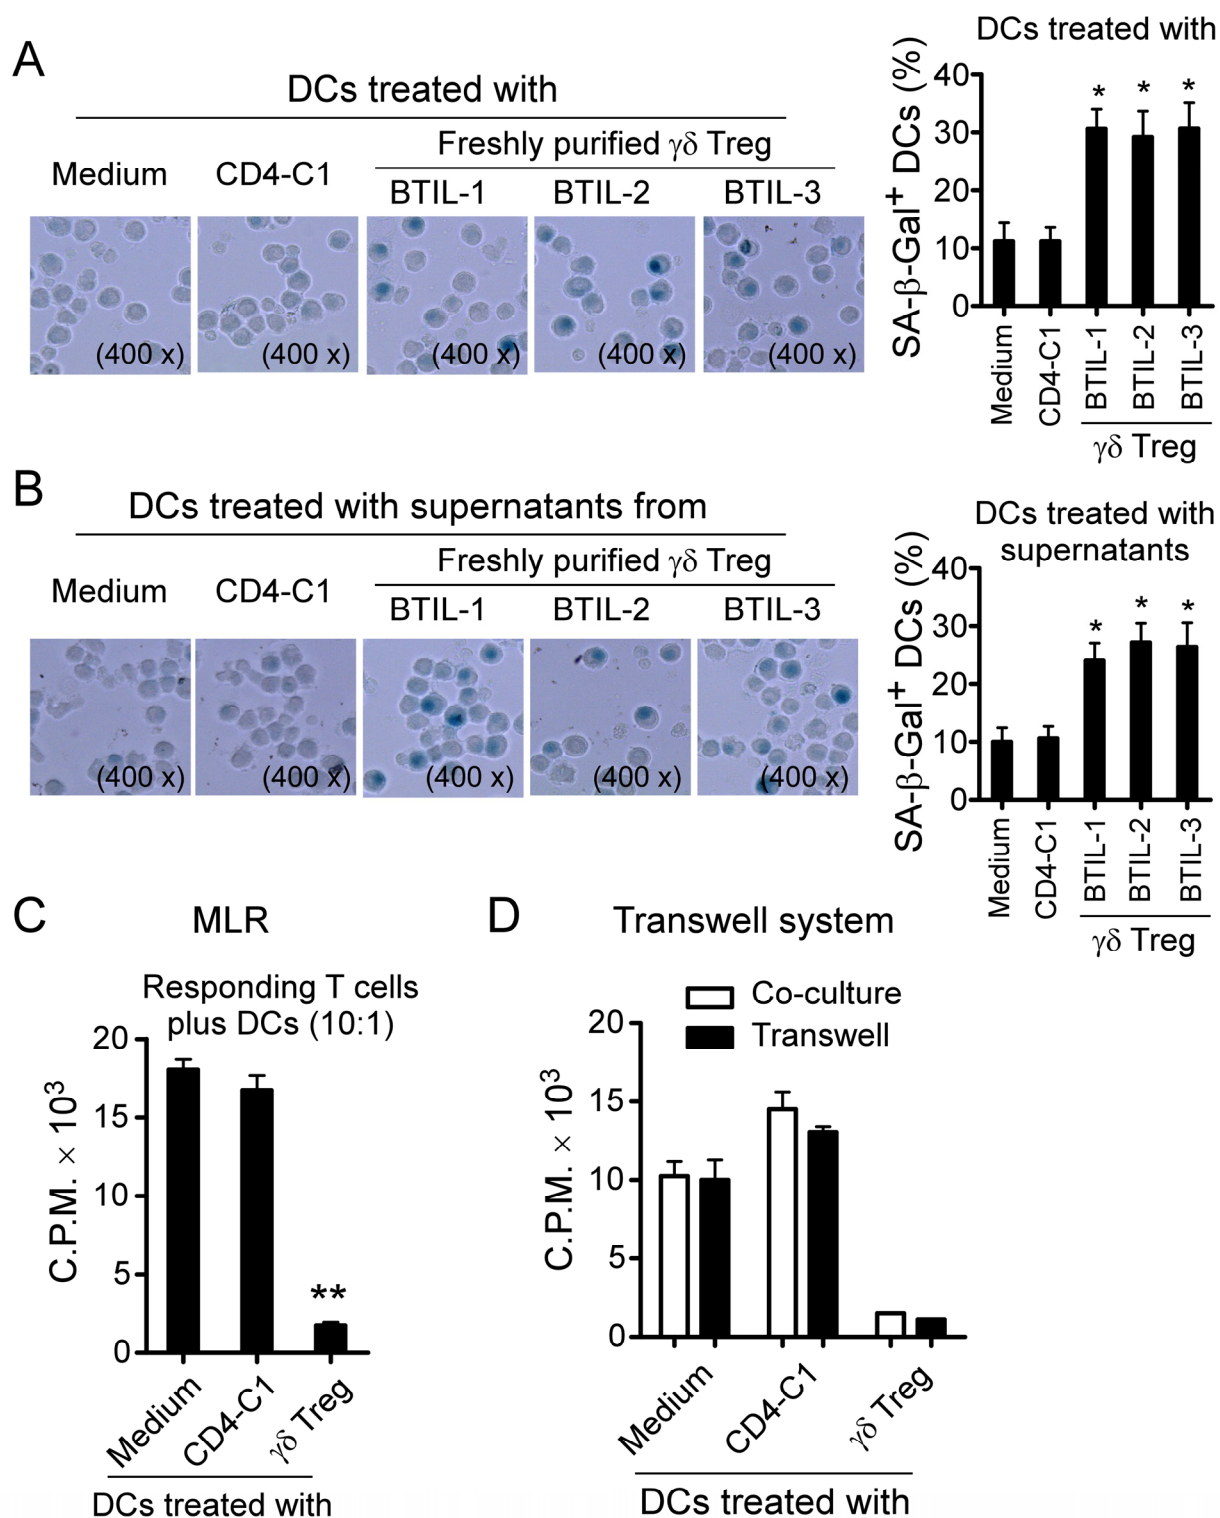

Supplement: NIHMS432536-supplement-2.pdf [file NIHMS432536-supplement-2.pdf]
